# Supplementary material for: Contrasting soil nitrogen dynamics across a montane meadow and urban lawn in a semi-arid watershed
Source: Springer Nature journal article supplement (doi:10.1007/s11252-016-0538-0), 2016-02-03
Supplement: MOESM1 [file 7439792]

**Supplemental Fig. 1:**

Representative variation in soil O2 at the lawn site during a period of frequent irrigation in summer; declines in O2 follow inputs of irrigation water. Lines represent three different sampling locations illustrating representative spatial variability in surface soil O2.
